# Supplementary material
Source: publisher site journal article supplement (https://www.dovepress.com/article/supplementary_file/557014/557014_appendix%201.docx)
Supplement: Supplementary file 1 [file 557014_appendix%201.docx]

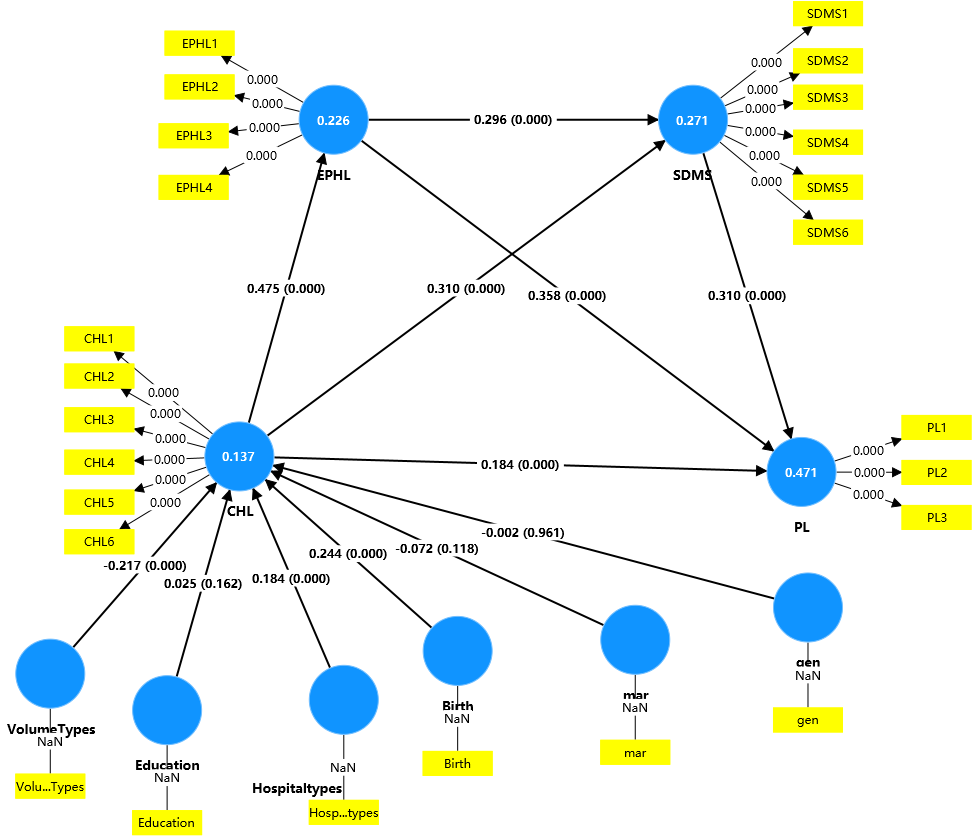


Appendix 1: Structural equation model results after controlling for demographic characteristics

**Abbreviations:**CHL: Communicative Health Literacy; EPHL: Enhancement of Perceived Health Literacy; DMIS: Decision-making Involvement Satisfaction; PL: Patient Loyalty; Gen: Gender; Mar: Marital status.
